# Supplementary material for: Immunomodulatory Transcription Factor BATF2 regulates the Interferon Stimulated Genes Expression during Influenza A virus Infection
Source: Research Square preprint supplement (doi:10.21203/rs.3.rs-6721231/v1), 2025-08-27

Western Blot

Figure Blot figure Actin

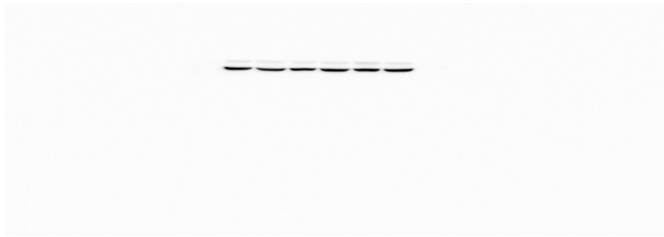

Figure 2 NP

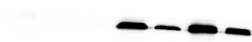

BATF2 Knock down results

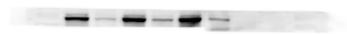

Figure 3 BATF 0h 12h and 24h used for 0h and 12h

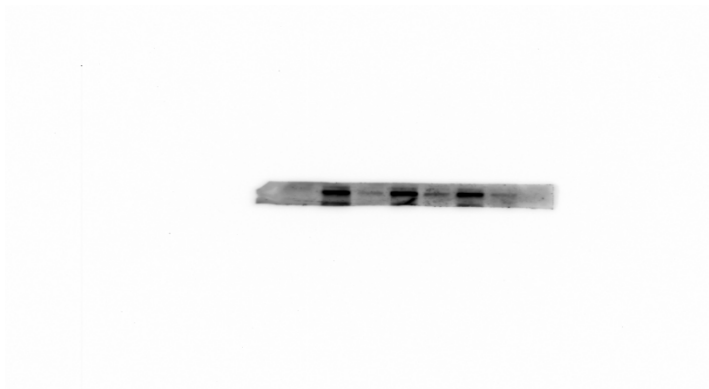

Figure 3 Actin

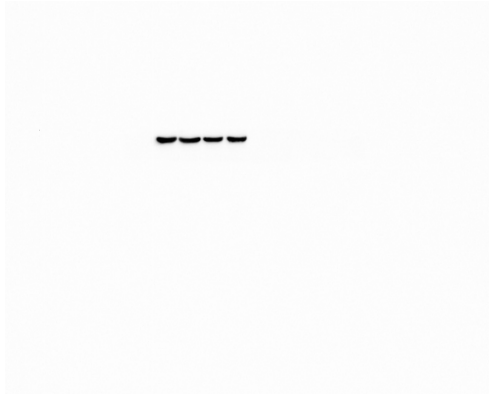

Figure 4 D BATF2 overexpression

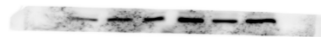

Figure 4 NP

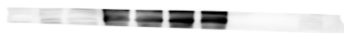

Actin Figure 4

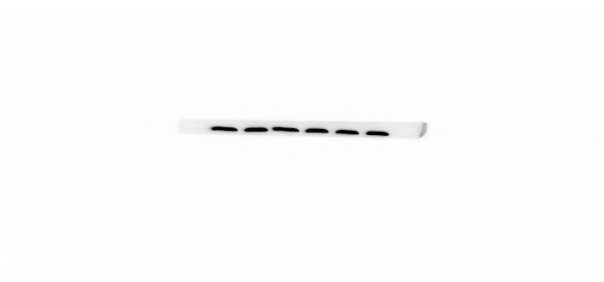

Figure 5

BATF2 for 0h and 12 bottom

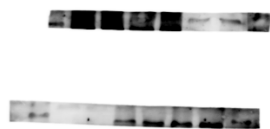

Actin

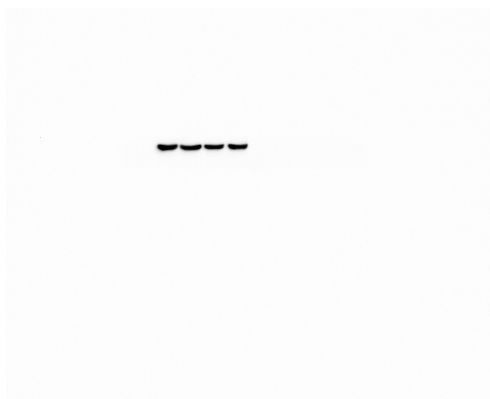

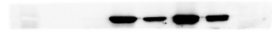

PCR gel Picture

Figure 1

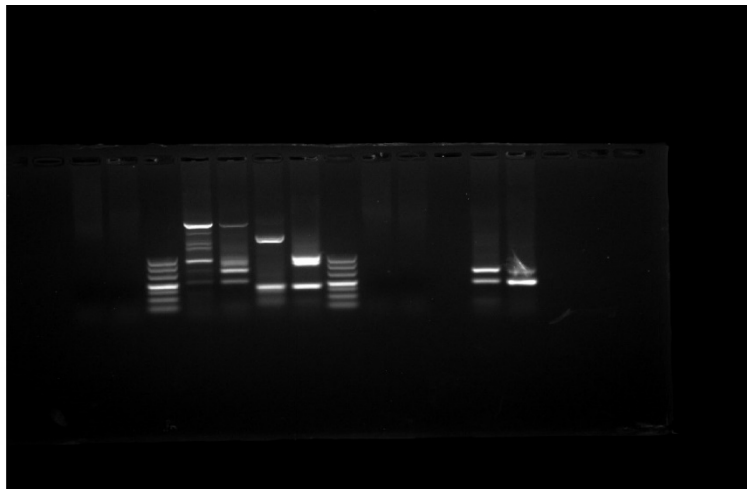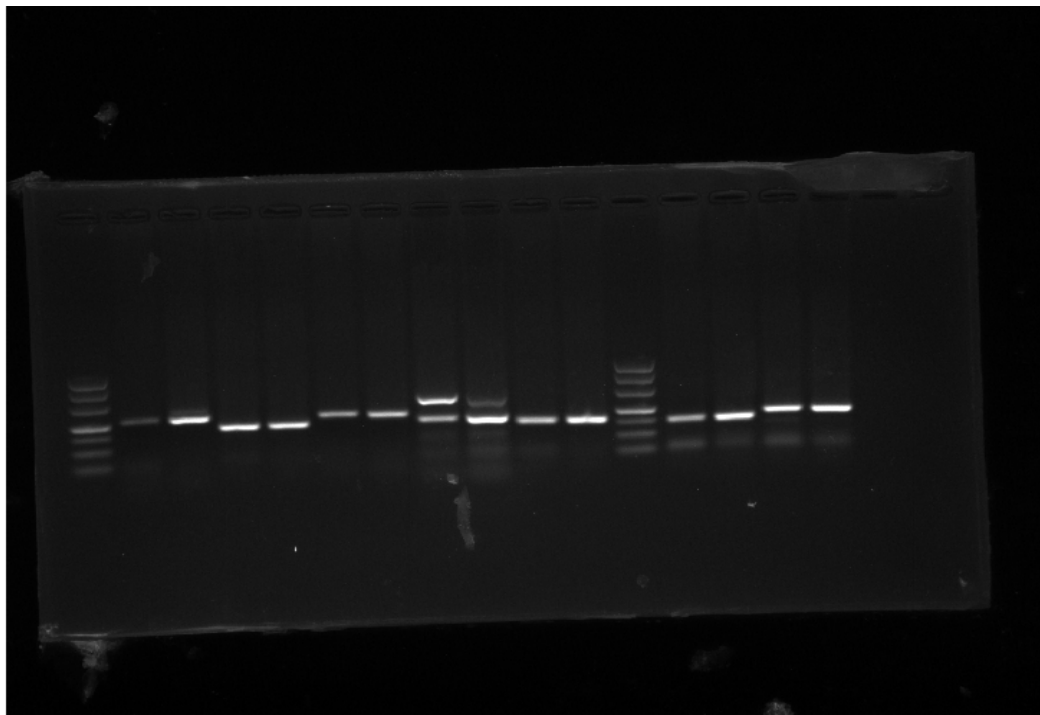

Figure 3

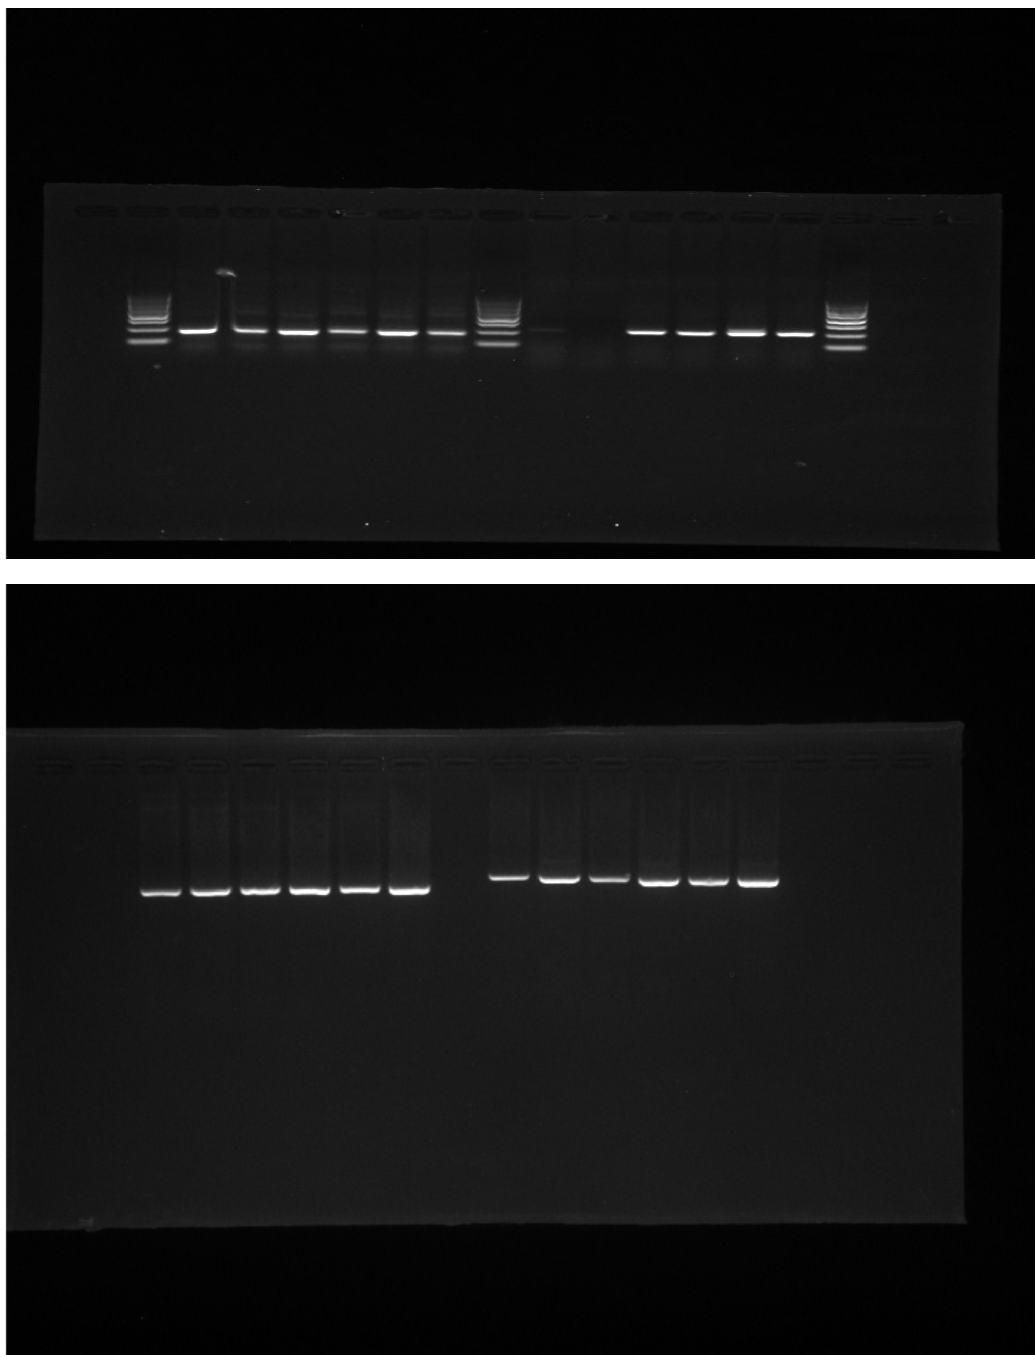

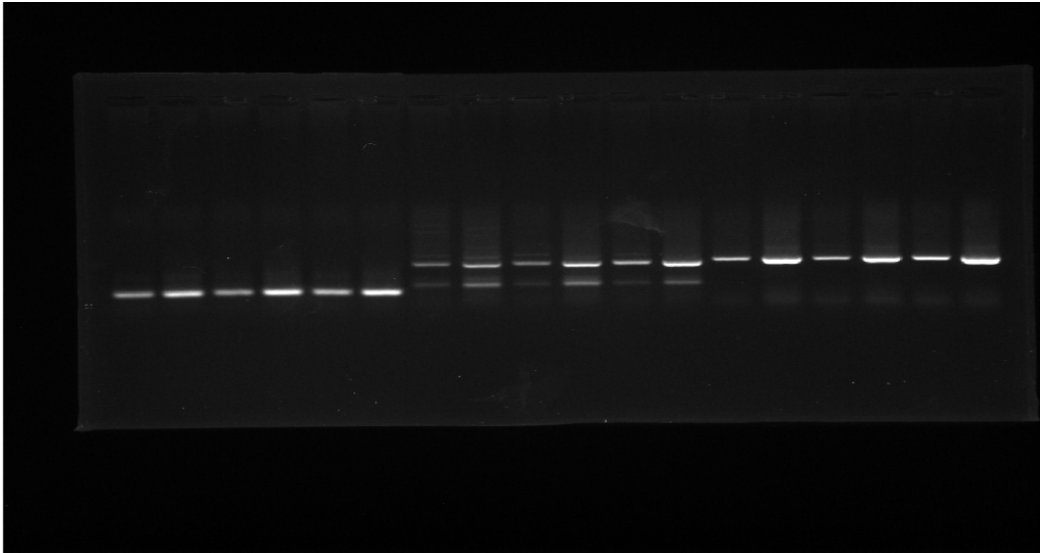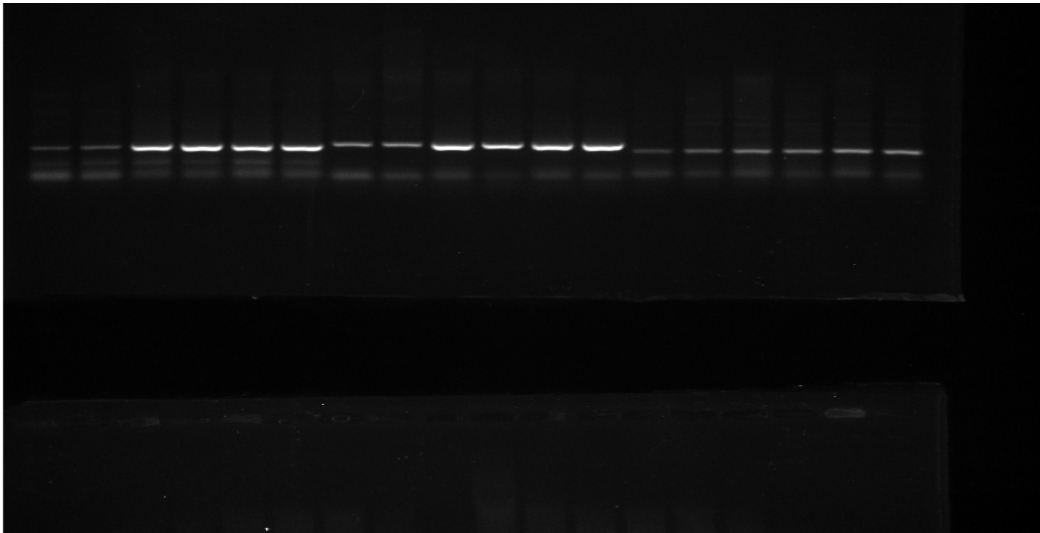

Figure 5

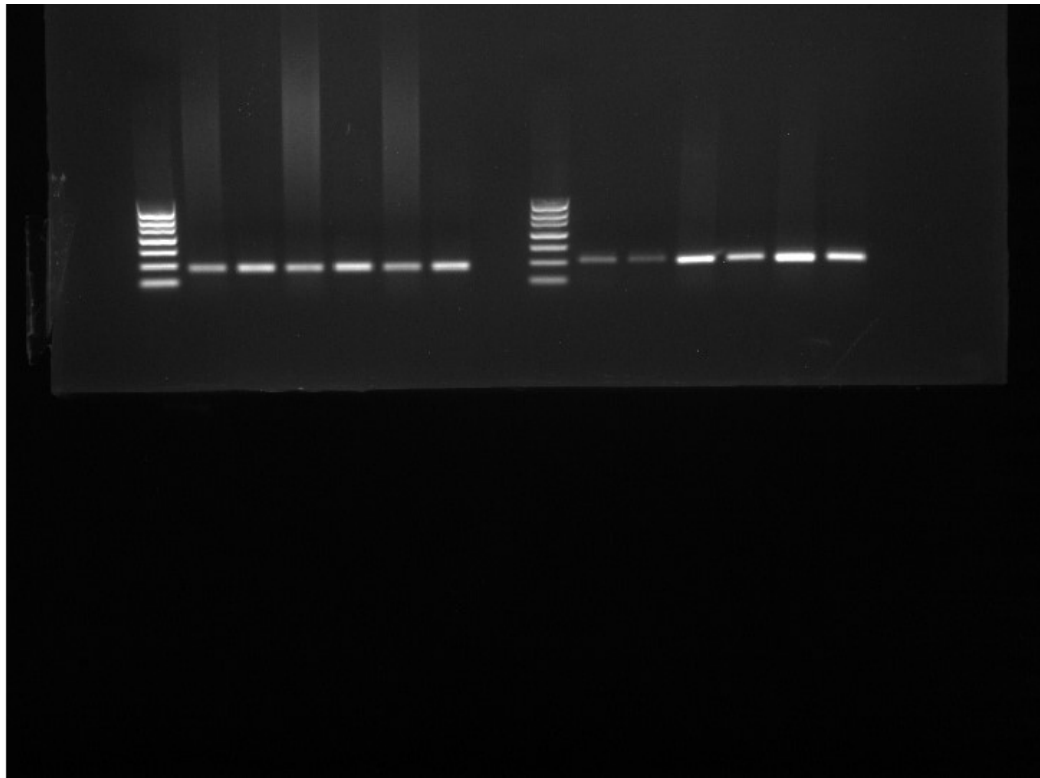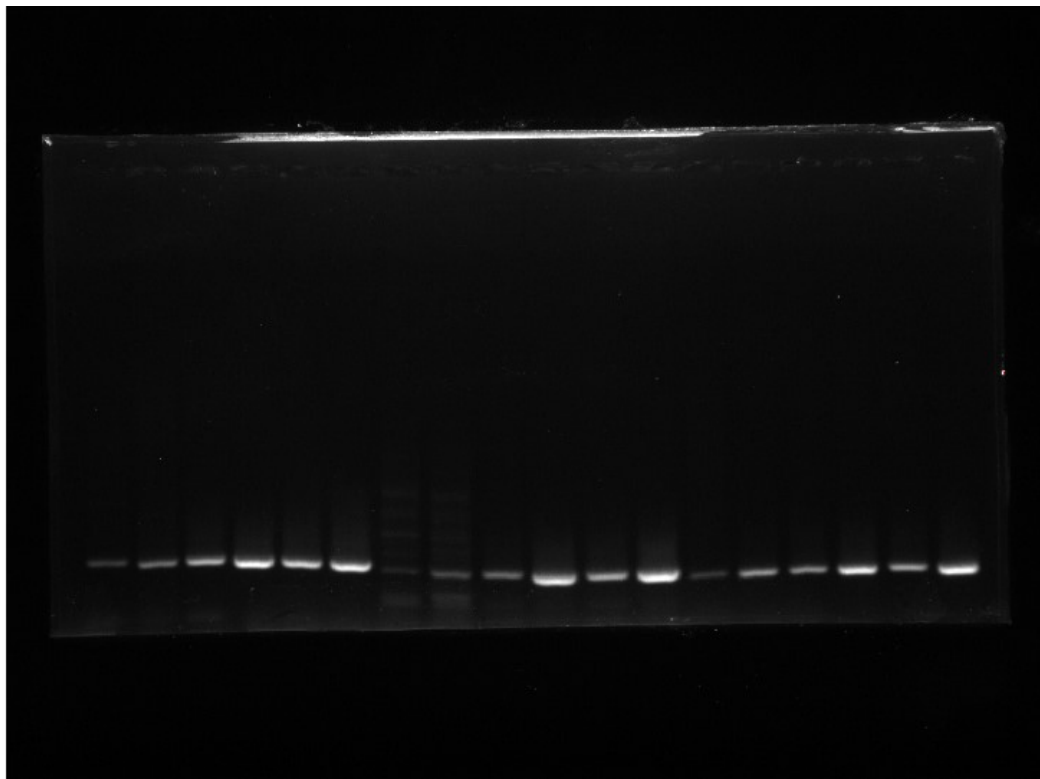

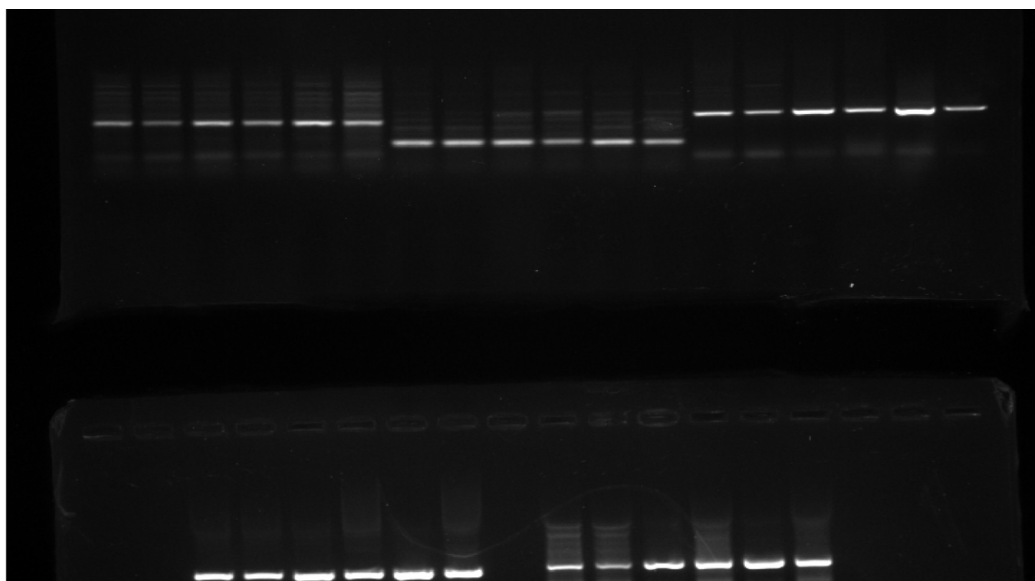

Supplement: Supplementary file 1 [file ebe8ba7e014df5f1ea58b384.pdf]
